# Supplementary material for: Preparation of CoS2 nanoflake arrays through ion exchange reaction of Co(OH)2 and their application as counter electrodes for dye-sensitized solar cells
Source: Royal Society of Chemistry journal article supplement (doi:10.1039/c4ra10584b), 2014-12-08
Supplement: c4ra10584b1.pdf [file c4ra10584b1.pdf]

### Supplementary Information

From the EDS analyses, the ratio of Co and S is about 0.578 in the CoS<sub>2</sub> nanocrystal grain. However, the ratio of Co and S is about 0.717 in the amorphous matrix not approaching to 1. This is to say that the cobalt sulfide amorphous matrix is the non-stoichiometric cobalt sulfide.

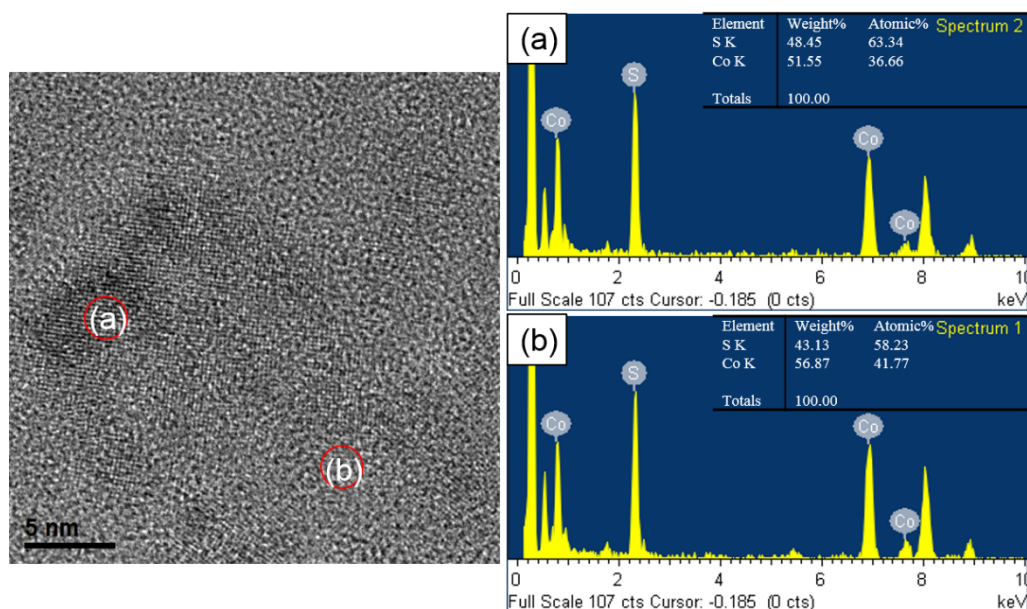

Fig. S1 The EDS analyses of different areas on a cobalt sulfide nanoflake: (a) CoS<sub>2</sub> nanocrystal and (b) cobalt sulfide amorphous matrix.
